# Supplementary material
Source: PubMed Central journal article supplement (PMC3627049)
Supplement: NIHMS52638-supplement-01.pdf [file NIHMS52638-supplement-01.pdf]

## **SUPPLEMENTARY MATERIAL**

In the following, the used microscopic and spectroscopic methods are presented in detail.

### **1.1.3. SAMPLE PROCESSING**

The samples fixed in formalin were decalcified and dehydrated in an increasing series of alcohol solutions, after which they were embedded in paraffin (Paraplast Plus, Lancer Division of Sherwood medical, Kildare, Ireland). Histological sections were then cut with a microtome (LKB 2218 HistoRange microtome, LKB produkter Ab, Bromma, Sweden) perpendicular to the cartilage surface. Section thicknesses were  $\sim 3 \mu\text{m}$  for DD and  $\sim 5 \mu\text{m}$  for PLM and FTIRI. DD sections were stained with safranin O<sup>1</sup> and for PLM and FTIRI sections, PGs were enzymatically removed prior to the measurements.

### **FOURIER TRANSFORM INFRARED SPECTROSCOPIC IMAGING**

Fourier Transform Infrared Imaging (FTIRI) was used to determine the spatial distribution of collagen content<sup>2-5</sup>. A Perkin Elmer Spotlight 300 (Perkin Elmer, Shelton, CO, USA), which had CO<sub>2</sub>-free dry air purge system (FT-IR purge gas generator, Parker Hannifin corporation, Haverhill, MA, USA) was utilized. Three sections were measured from each sample. Produced sections were installed on BaF<sub>2</sub> windows. FTIRI data from the sections was collected using 4 cm<sup>-1</sup> spectral resolution and 6.25  $\mu\text{m}$  pixel resolution with 4 repeated scans. Collagen content was estimated by integration of the amide I region (1585 – 1720 cm<sup>-1</sup>) (Fig. 2). The measured pixel values were averaged in the

transversal direction and the average depth-wise collagen profiles were calculated from the three sections from each sample (Fig. 2). Analyses of the IR spectra were done using custom-made Matlab scripts.

#### **1.1.4. POLARIZED LIGHT MICROSCOPY**

PLM was used to analyze the collagen orientation angles of the samples in a depth-dependent manner<sup>6,7</sup>. In PLM, the collagen fibers parallel to the cartilage surface give an angle of 0° (superficial zone) and the fibers perpendicular to the cartilage surface give an angle of 90° (deep zone). Measurements were done with Leitz Ortholux II POL-polarized microscope (Leitz, Wetzlar, Germany) with 4x magnification, equipped with CCD camera (Photometrics CH 250/A, Photometrics Inc., Tucson, AZ, USA). The measured pixel values were averaged in the transversal direction and the average depth-wise birefringence profiles were calculated from three sections (Fig. 3). Calculation of the collagen orientation of the samples was based on Stokes parameters<sup>6,7</sup>.

#### **1.1.5. DIGITAL DENSITOMETRY AND MANKIN SCORING**

Spatial distribution of PGs was determined using the digital densitometry of Safranin O stained histological sections<sup>8,9</sup>. Sections were measured with a computer-controlled CCD camera (SenSys, Photometrics Inc., Tucson, AZ, USA) mounted on a light microscope (Leitz Orthoplan, Leitz, Wetzlar, Germany). Grayscale images of the Safranin O stained sections were captured and the optical density was used to estimate the tissue fixed charge density and distribution of PGs. The pixel values were averaged in the transversal

direction and the average depth-wise profiles were created from three sections of each sample (Fig. 4). After DD, the sections were used to determine the Mankin score of the samples, which reflects the severity of OA of the cartilage samples<sup>10, 11</sup>.

## REFERENCES

1. Korhonen RK, Laasanen MS, Toyras J, Rieppo J, Hirvonen J, Helminen HJ, *et al.*  
Comparison of the equilibrium response of articular cartilage in unconfined compression, confined compression and indentation. *J.Biomech.* 2002;35:903-9.
2. Saarakkala S, Julkunen P, Kiviranta P, Makitalo J, Jurvelin JS, Korhonen RK. Depth-wise progression of osteoarthritis in human articular cartilage: investigation of composition, structure and biomechanics. *Osteoarthritis Cartilage* 2010;18:73-81.
3. Bi X, Yang X, Bostrom MP, Camacho NP. Fourier transform infrared imaging spectroscopy investigations in the pathogenesis and repair of cartilage. *Biochim.Biophys.Acta* 2006;1758:934-41.
4. Boskey A and Pleshko Camacho N. FT-IR imaging of native and tissue-engineered bone and cartilage. *Biomaterials* 2007;28:2465-78.
5. Camacho NP, West P, Torzilli PA, Mendelsohn R. FTIR microscopic imaging of collagen and proteoglycan in bovine cartilage. *Biopolymers* 2001;62:1-8.
6. Rieppo J, Hallikainen J, Jurvelin JS, Kiviranta I, Helminen HJ, Hyttinen MM. Practical considerations in the use of polarized light microscopy in the analysis of the collagen network in articular cartilage. *Microsc.Res.Tech.* 2008;71:279-87.
7. Rieppo J, Hyttinen MM, Halmesmaki E, Ruotsalainen H, Vasara A, Kiviranta I, *et al.*  
Changes in spatial collagen content and collagen network architecture in porcine articular cartilage during growth and maturation. *Osteoarthritis Cartilage* 2009;17:448-55.
8. Kiraly K, Lapvetelainen T, Arokoski J, Torronen K, Modis L, Kiviranta I, *et al.*  
Application of selected cationic dyes for the semiquantitative estimation of

glycosaminoglycans in histological sections of articular cartilage by  
microspectrophotometry. *Histochem.J.* 1996;28:577-90.

9. Kiviranta I, Jurvelin J, Tammi M, Saamanen AM, Helminen HJ.

Microspectrophotometric quantitation of glycosaminoglycans in articular cartilage  
sections stained with Safranin O. *Histochemistry* 1985;82:249-55.

10. Mankin HJ and Lippiello L. Biochemical and metabolic abnormalities in articular  
cartilage from osteo-arthritic human hips. *J.Bone Joint Surg.Am.* 1970;52:424-34.

11. Mankin HJ, Dorfman H, Lippiello L, Zarins A. Biochemical and metabolic  
abnormalities in articular cartilage from osteo-arthritic human hips. II. Correlation of  
morphology with biochemical and metabolic data. *J.Bone Joint Surg.Am.* 1971;53:523-  
37.
